# Supplementary material
Source: ML conference proceedings conference paper supplement (https://openaccess.thecvf.com/content/CVPR2021/html/Zheng_Regularizing_Neural_Networks_CVPR_2021_paper.html)
Supplement: Supplementary file 1 [file Zheng_Regularizing_Neural_Networks_CVPR_2021_supplemental.pdf]

# Regularizing Neural Networks via Adversarial Model Perturbation

## Supplementary Material

Yaowei Zheng  
BDBC and SKLSDE  
Beihang University, China  
hiyouga@buaa.edu.cn

Richong Zhang\*  
BDBC and SKLSDE  
Beihang University, China  
zhangrc@act.buaa.edu.cn

Yongyi Mao  
School of EECS  
University of Ottawa, Canada  
ymao@uottawa.ca

### A. Proof of Corollary 2

**Corollary 2.** *Suppose that  $C_1 = C_2$ . Let  $A_2 = \beta A_1$  for some  $\beta < 1$ . Note that in this setting,  $\gamma_1^* < \gamma_2^*$ . Suppose that  $\sigma_2^2 = r\sigma_1^2$  for some positive  $r$ . Then*

$$\gamma_{2,\text{AMP}}^* < \gamma_{1,\text{AMP}}^*$$

if and only if

$$\beta > \exp\left(-\frac{\epsilon^2}{2\sigma_1^2}\right) \text{ and } r > \frac{1}{1 + \frac{2\sigma_1^2}{\epsilon^2} \log \beta}$$

*Proof.* Since  $C_1 = C_2$ , we have

$$0 > \exp\left(-\frac{\epsilon^2}{2\sigma_1^2}\right) - \beta \exp\left(-\frac{\epsilon^2}{2r\sigma_1^2}\right)$$

It then follows that

$$\frac{\epsilon^2}{2r\sigma_1^2} < \frac{\epsilon^2}{2\sigma_1^2} + \log \beta \quad (1)$$

noting that  $\log \beta < 0$ , we have  $r > 1$ .

Further manipulating (1), we get

$$\frac{1}{r} < 1 + \frac{2\sigma_1^2}{\epsilon^2} \log \beta \quad (2)$$

Since  $r > 0$ , the right side of (2) is positive, which gives rise to

$$\beta > \exp\left(-\frac{\epsilon^2}{2\sigma_1^2}\right)$$

Continuing with (2), we arrive at

$$r > \frac{1}{1 + \frac{2\sigma_1^2}{\epsilon^2} \log \beta}$$

This proves the result.  $\square$

\*Corresponding author

### B. Proof of Theorem 2

**Theorem 2.** *Let  $N = 1$ . Then for a sufficiently small inner learning rate  $\zeta$ , a minimization update step in AMP training for batch  $\mathcal{B}$  is equivalent to a gradient-descent step on the following loss function with learning rate  $\eta$ :*

$$\tilde{\mathcal{J}}_{\text{ERM},\mathcal{B}}(\boldsymbol{\theta}) := \mathcal{J}_{\text{ERM},\mathcal{B}}(\boldsymbol{\theta}) + \Omega(\boldsymbol{\theta})$$

where

$$\Omega(\boldsymbol{\theta}) := \begin{cases} \zeta \|\nabla_{\boldsymbol{\theta}} \mathcal{J}_{\text{ERM},\mathcal{B}}(\boldsymbol{\theta})\|_2^2, & \|\zeta \nabla_{\boldsymbol{\theta}} \mathcal{J}_{\text{ERM},\mathcal{B}}(\boldsymbol{\theta})\|_2 \leq \epsilon \\ \epsilon \|\nabla_{\boldsymbol{\theta}} \mathcal{J}_{\text{ERM},\mathcal{B}}(\boldsymbol{\theta})\|_2, & \|\zeta \nabla_{\boldsymbol{\theta}} \mathcal{J}_{\text{ERM},\mathcal{B}}(\boldsymbol{\theta})\|_2 > \epsilon \end{cases}$$

*Proof.* At each training step of AMP, we adversarially perturb the parameter with a step size of  $\zeta$ . If the norm of perturbation is larger than a preset value  $\epsilon$ , it will be projected onto the  $L_2$ -norm ball. Denoted by  $\boldsymbol{\theta}_k$  the model parameter at the  $k$ -th iteration, the perturbed parameter is:

$$\boldsymbol{\theta}_{k,\text{adv}} = \begin{cases} \boldsymbol{\theta}_k + \zeta \nabla_{\boldsymbol{\theta}} \mathcal{J}_{\text{ERM},\mathcal{B}}(\boldsymbol{\theta}_k), & \|\zeta \nabla_{\boldsymbol{\theta}} \mathcal{J}_{\text{ERM},\mathcal{B}}(\boldsymbol{\theta}_k)\|_2 \leq \epsilon \\ \boldsymbol{\theta}_k + \epsilon \frac{\nabla_{\boldsymbol{\theta}} \mathcal{J}_{\text{ERM},\mathcal{B}}(\boldsymbol{\theta}_k)}{\|\nabla_{\boldsymbol{\theta}} \mathcal{J}_{\text{ERM},\mathcal{B}}(\boldsymbol{\theta}_k)\|_2}, & \|\zeta \nabla_{\boldsymbol{\theta}} \mathcal{J}_{\text{ERM},\mathcal{B}}(\boldsymbol{\theta}_k)\|_2 > \epsilon \end{cases}$$

Then the parameter is updated according to the gradient computed by the perturbed parameter with a step size of  $\eta$ :

$$\boldsymbol{\theta}_{k+1} = \boldsymbol{\theta}_k - \eta \nabla_{\boldsymbol{\theta}} \mathcal{J}_{\text{ERM},\mathcal{B}}(\boldsymbol{\theta}_{k,\text{adv}})$$

With a sufficient small  $\zeta$ , we can utilize the first-order Taylor expansion  $f(\mathbf{x} + \boldsymbol{\delta}) \approx f(\mathbf{x}) + \boldsymbol{\delta}^T \nabla_{\mathbf{x}} f(\mathbf{x})$ . In the former condition (i.e.  $\|\zeta \nabla_{\boldsymbol{\theta}} \mathcal{J}_{\text{ERM},\mathcal{B}}(\boldsymbol{\theta})\|_2 \leq \epsilon$ ), we have:

$$\begin{aligned} \boldsymbol{\theta}_{k+1} &= \boldsymbol{\theta}_k - \eta \nabla_{\boldsymbol{\theta}} \mathcal{J}_{\text{ERM},\mathcal{B}}(\boldsymbol{\theta}_k + \zeta \nabla_{\boldsymbol{\theta}} \mathcal{J}_{\text{ERM},\mathcal{B}}(\boldsymbol{\theta}_k)) \\ &\approx \boldsymbol{\theta}_k - \eta \nabla_{\boldsymbol{\theta}} (\mathcal{J}_{\text{ERM},\mathcal{B}}(\boldsymbol{\theta}_k) + \zeta \|\nabla_{\boldsymbol{\theta}} \mathcal{J}_{\text{ERM},\mathcal{B}}(\boldsymbol{\theta}_k)\|_2^2) \end{aligned}$$

In the latter condition (i.e.  $\|\zeta \nabla_{\boldsymbol{\theta}} \mathcal{J}_{\text{ERM},\mathcal{B}}(\boldsymbol{\theta})\|_2 > \epsilon$ ), we have:

$$\begin{aligned} \boldsymbol{\theta}_{k+1} &= \boldsymbol{\theta}_k - \eta \nabla_{\boldsymbol{\theta}} \mathcal{J}_{\text{ERM},\mathcal{B}}\left(\boldsymbol{\theta}_k + \epsilon \frac{\nabla_{\boldsymbol{\theta}} \mathcal{J}_{\text{ERM},\mathcal{B}}(\boldsymbol{\theta}_k)}{\|\nabla_{\boldsymbol{\theta}} \mathcal{J}_{\text{ERM},\mathcal{B}}(\boldsymbol{\theta}_k)\|_2}\right) \\ &\approx \boldsymbol{\theta}_k - \eta \nabla_{\boldsymbol{\theta}} (\mathcal{J}_{\text{ERM},\mathcal{B}}(\boldsymbol{\theta}_k) + \epsilon \|\nabla_{\boldsymbol{\theta}} \mathcal{J}_{\text{ERM},\mathcal{B}}(\boldsymbol{\theta}_k)\|_2) \end{aligned}$$

This proves the theorem.  $\square$

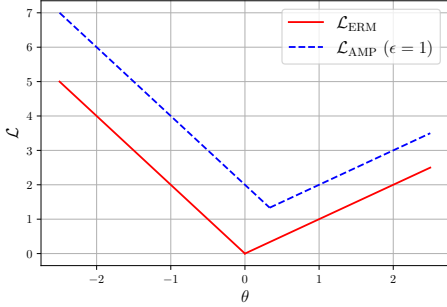

Figure 1: The losses of ERM and AMP with varying  $\theta$ .

### C. Why AMP is not Adversarial Training

In this section, we will further discuss the difference between AMP and adversarial training (ADV).

It is sensible that perturbing weights  $\theta$  may have an effect similar to perturbing the examples  $x$  since  $\theta$  and  $x$  usually appear together via inner product  $\theta^\top x$ . However we note that except for some peculiar cases (such as linear network with some peculiar choices of the loss function or a set of peculiarly constructed training examples), in general the solution  $\theta_{\text{AMP}}^*$  to the AMP optimization problem is different from the solution  $\theta_{\text{ADV}}^*$  to the ADV counterpart. The difference between  $\theta_{\text{AMP}}^*$  and  $\theta_{\text{ADV}}^*$  can be attributed to two sources.

First, let  $\ell(x; \theta)$  denote the ERM loss for a single training example  $x$ . For  $N$  examples, the overall ERM loss  $\mathcal{L}_{\text{ERM}}$  is the sum (or average) of  $\ell(x_i; \theta)$  over all examples  $x_i$ ,  $i = 1, \dots, N$ . In AMP, the perturbation is to maximize the overall empirical loss  $\mathcal{L}_{\text{ERM}}$  and this perturbation is applied globally to weights  $\theta$ . However, in ADV, the perturbation is applied individually to each training example  $x_i$ , with the objective of maximizing the individual ERM loss  $\ell(x_i; \theta)$ .

Second, even in the case when there is only one training example  $x$  so that  $\mathcal{L}_{\text{ERM}} = \ell$ ,  $\theta_{\text{AMP}}^*$  and  $\theta_{\text{ADV}}^*$  may still be different. Here is an example. Let

$$g(z) := \begin{cases} z & \text{if } z \geq 0 \\ -2z & \text{if } z < 0 \end{cases}$$

Consider that there is a single scalar example  $x = 1$  and the weight  $\theta$  is a scalar. Define  $\ell(x; \theta) = g(\theta x)$ . It can be verified that  $\theta_{\text{ADV}}^* = \theta_{\text{ERM}}^* = 0$  regardless of the perturbation radius  $\epsilon$ , but  $\theta_{\text{AMP}}^* = \epsilon/3$  (see Figure 1, where the losses are plotted as functions of  $\theta$ ).

### D. Definition of Expected Calibration Error

We follow the definition presented in the previous work [2]. Firstly, the predictions are grouped into  $M$  interval bins of equal sizes. Let  $B_m$  be the set of indices of samples whose prediction scores (the winning softmax score) fall into the

| FGSM            | SVHN               | CIFAR-10           | CIFAR-100          |
|-----------------|--------------------|--------------------|--------------------|
| ERM             | 23.41±0.569        | 36.06±1.908        | 68.78±0.699        |
| Dropout         | 22.36±0.591        | 34.13±0.844        | 64.70±0.549        |
| Label Smoothing | 17.74±1.674        | 23.24±0.427        | 57.30±0.410        |
| Flooding        | 17.40±0.656        | 36.42±1.303        | 68.45±0.407        |
| MixUp           | 19.95±0.637        | 25.82±0.384        | 65.90±0.498        |
| Adv. Training   | <b>14.33±0.200</b> | <b>18.58±0.304</b> | <b>48.51±0.260</b> |
| RMP             | 23.73±0.965        | 35.40±0.572        | 68.52±0.515        |
| AMP             | 16.82±1.561        | 28.61±0.359        | 59.04±1.325        |

  

| PGD             | SVHN               | CIFAR-10           | CIFAR-100          |
|-----------------|--------------------|--------------------|--------------------|
| ERM             | 45.17±1.085        | 58.88±2.296        | 85.46±0.770        |
| Dropout         | 41.76±1.346        | 55.21±1.088        | 78.46±1.081        |
| Label Smoothing | 32.55±2.005        | 34.93±0.443        | 65.31±0.700        |
| Flooding        | 33.50±1.707        | 60.32±1.393        | 84.66±0.285        |
| MixUp           | 75.75±2.129        | 62.77±1.018        | 89.58±0.596        |
| Adv. Training   | <b>20.20±0.409</b> | <b>21.46±0.373</b> | <b>51.72±0.327</b> |
| RMP             | 44.74±0.960        | 58.06±0.650        | 84.80±0.488        |
| AMP             | 25.15±1.942        | 49.72±0.785        | 73.95±2.608        |

Table 1: Test errors (%) against the white-box FGSM and PGD adversarial attacks. Each experiment has been run ten times to report the mean and standard derivation of errors.

interval  $I_m = (\frac{m-1}{M}, \frac{m}{M}]$ . The accuracy and confidence of  $B_m$  are defined as:

$$\text{acc}(B_m) = \frac{1}{|B_m|} \sum_{i \in B_m} \mathbf{1}(\hat{y}_i = y_i)$$

$$\text{conf}(B_m) = \frac{1}{|B_m|} \sum_{i \in B_m} \hat{p}_i$$

where  $\hat{y}_i$  and  $y_i$  are the predicted label and true class labels for sample  $i$ ,  $\hat{p}_i$  is the confidence (the winning softmax score) of sample  $i$ . The *Expected Calibration Error* (ECE) is defined as the difference in expectation between confidence and accuracy, i.e.:

$$\text{ECE} = \sum_{m=1}^M \frac{|B_m|}{n} \left| \text{acc}(B_m) - \text{conf}(B_m) \right|$$

where  $n$  is the number of samples.

### E. Influence of Perturbation

We plot the empirical risks of the pretrained PreActResNet18 models on three image datasets with varying perturbation radius in Figure 2. To clearly illustrate this, we adopt  $\eta = 2$  and  $N = 2$ . In these experiments, the perturbation radius  $\epsilon$  meets the sweet spots around 0.06 on all the three datasets, where  $\mathcal{L}_{\text{ERM}}(\theta_{\text{AMP}}^*)$  gets the minimum value.

### F. Robustness to Adversarial Attacks

The previous work [5] suggests that the flat minima make the adversarial attacks take more efforts for the input to leave the minima, so AMP is expected to improve the model's

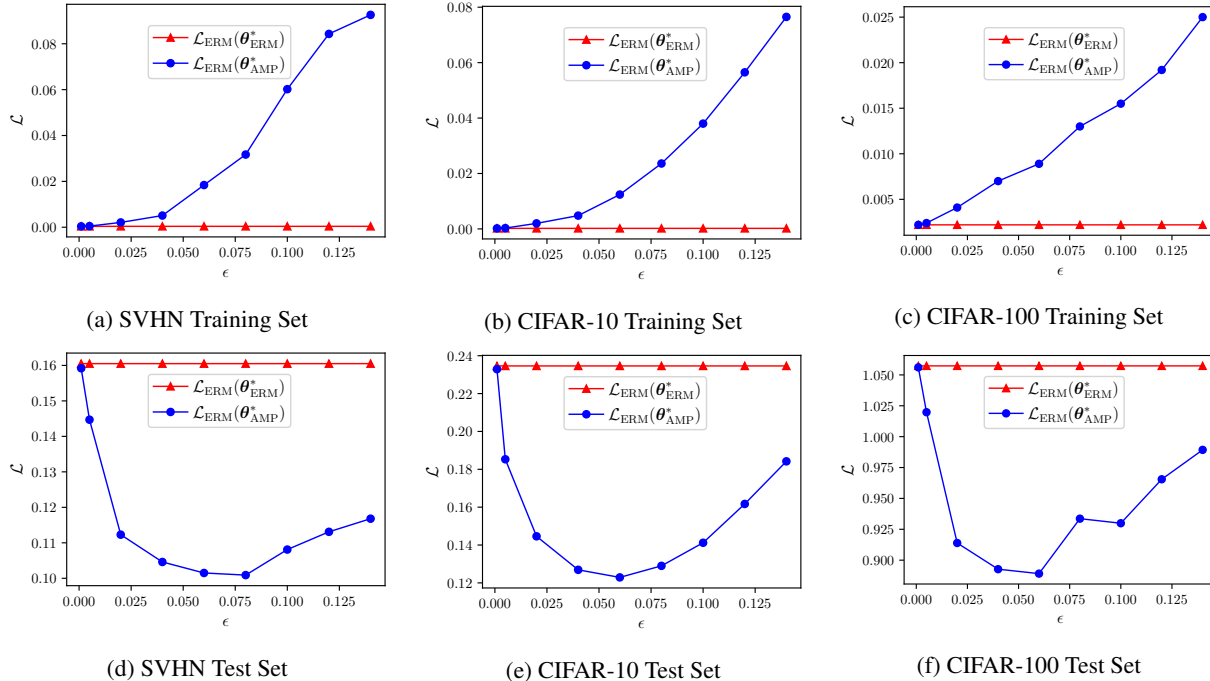

Figure 2: The comparison of  $\mathcal{L}_{\text{ERM}}$  of the models trained with ERM (red) and AMP (blue) with varying perturbation radius.

adversarial robustness. To validate this, we use the models trained with different regularization schemes to evaluate their adversarial robustness against the Fast Gradient Sign Method (FGSM) [1] and Projected Gradient Decent (PGD) [4] attacks. For FGSM, we set the perturbation radius to 4 per pixel. For PGD, we set the step size to 1 and perform 10 steps to generate adversarial examples, the perturbation radius is the same as FGSM. PreActResNet18 is chosen as the model architecture. We report the top-1 classification error on the adversarial examples constructed from the test set in Table 1. From the results, adversarial training outperforms all other schemes, since it directly trains models on the adversarial examples. AMP and label smoothing also show an effect in improving the model’s robustness against both single-step FGSM attack and multi-step PGD attack.

### G. Loss Curve

To investigate the mechanism of different regularization schemes in the training course, we plot the evolution curves of the training loss and the test loss in Figure 3 using PreActResNet18. We select ERM and two representative analogues (Flooding and MixUp) which achieved the second-best performance in the previous experiment to compare with AMP. From Figure 3, ERM obtains the smallest training loss, and MixUp retains a high training loss since it trains models on augmented examples. AMP injects a small perturbation into the model parameter, and hence the training loss is slightly increased. It appears that the Flooding scheme affects train-

ing only when the training loss drops to a very low value, whereas MixUp and AMP take effects much earlier. For the test loss, AMP converges at a similar speed as other schemes, and reduces the test loss to a smaller value at the final stage.

### H. Flatness of Selected Minima

We visualize the landscapes around the minima of the empirical risk selected by ERM or AMP, the 2D views are plotted in Figure 4 and the 3D views are in Figure 5. Specifically, we compute the empirical risks of the PreActResNet18 models whose parameter is perturbed along two random directions  $\mathbf{d}_x, \mathbf{d}_j$  with different step sizes  $\delta_x, \delta_y$ , where the direction vectors are normalized by the norm of filters suggested by [3]. Specifically, we visualize the landscapes by computing

$$\mathcal{L}_{\text{ERM}}(\theta^* + \delta_x \mathbf{d}_x + \delta_y \mathbf{d}_y)$$

The results suggest that AMP indeed selects flatter minima via adversarial perturbations.

### I. Computing Environment and Resources

Our PyTorch code is executed in a CUDA environment. When evaluated on a single Tesla V100 GPU, the code takes around 2.4 hours to train a PreActResNet18 model with ERM on the CIFAR-10 dataset, and around 4.2 hours with AMP. The computation time mainly depends on the number of inner iterations, the number of epochs, and the number of GPUs. The code and datasets for reproduction can be found at <https://github.com/hiyouga/AMP-Regularizer>.

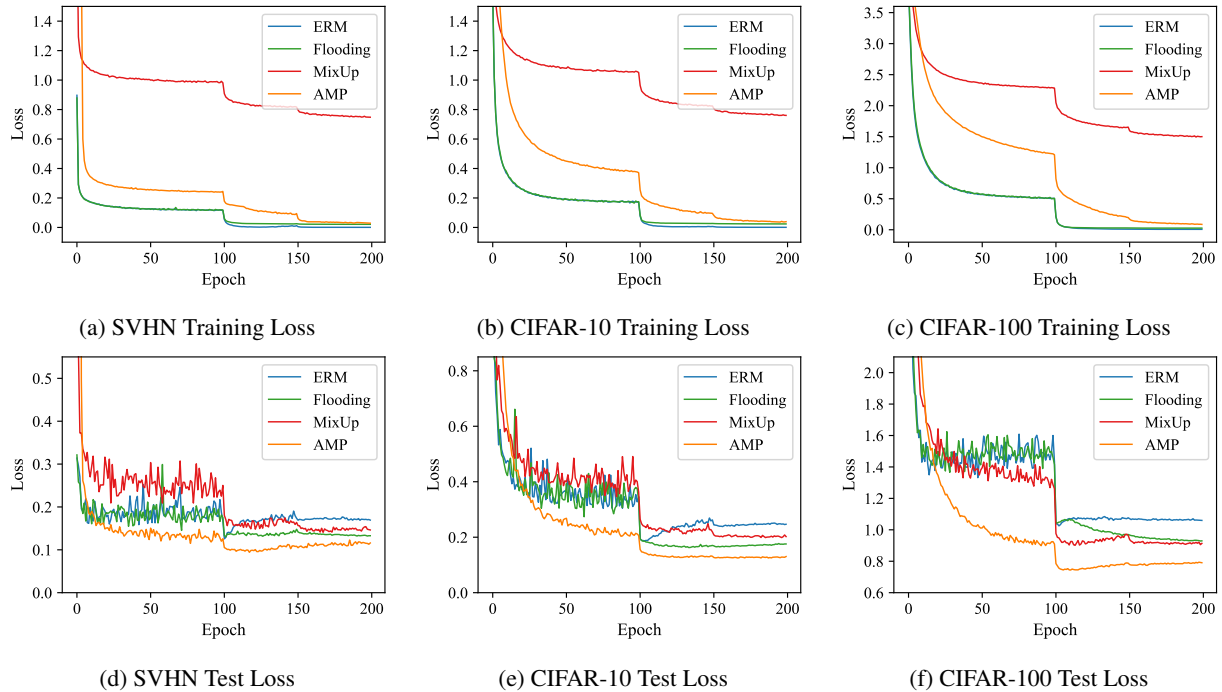

Figure 3: Loss curves for PreActResNet18 with different regularization schemes on three benchmark image datasets.

## References

- [1] Ian J. Goodfellow, Jonathon Shlens, and Christian Szegedy. Explaining and harnessing adversarial examples. In *3rd International Conference on Learning Representations, ICLR*, 2015.
- [2] Chuan Guo, Geoff Pleiss, Yu Sun, and Kilian Q Weinberger. On calibration of modern neural networks. In *Proceedings of the 34th International Conference on Machine Learning, ICML*, pages 1321–1330, 2017.
- [3] Hao Li, Zheng Xu, Gavin Taylor, Christoph Studer, and Tom Goldstein. Visualizing the loss landscape of neural nets. In *Advances in Neural Information Processing Systems*, pages 6389–6399, 2018.
- [4] Aleksander Madry, Aleksandar Makelov, Ludwig Schmidt, Dimitris Tsipras, and Adrian Vladu. Towards deep learning models resistant to adversarial attacks. In *6th International Conference on Learning Representations, ICLR*, 2018.
- [5] Pu Zhao, Pin-Yu Chen, Payel Das, Karthikeyan Natesan Ramamurthy, and Xue Lin. Bridging mode connectivity in loss landscapes and adversarial robustness. In *8th International Conference on Learning Representations, ICLR*, 2020.

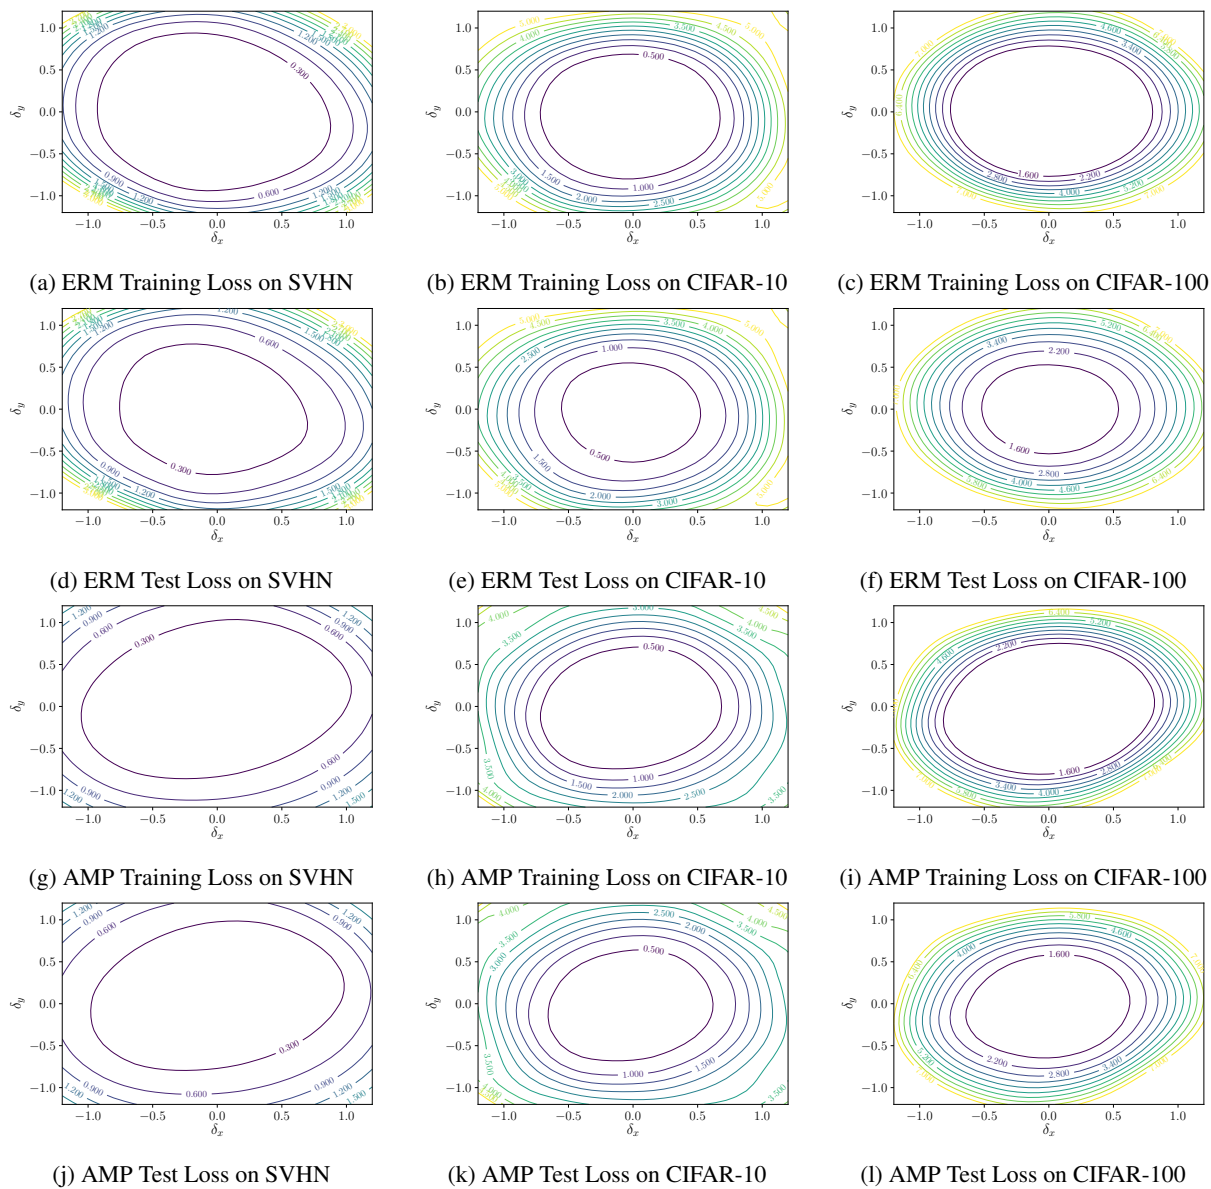

Figure 4: 2D visualization of the minima of the empirical risk selected by ERM and AMP on three benchmark image datasets.

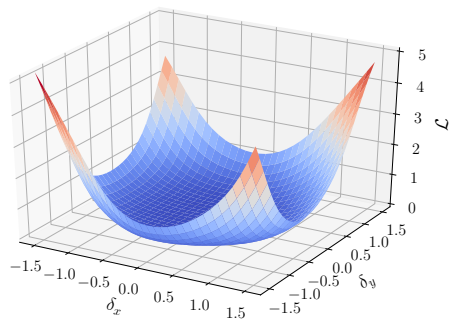

(a) ERM Training Loss

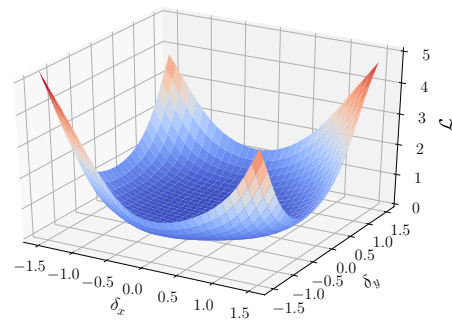

(b) ERM Test Loss

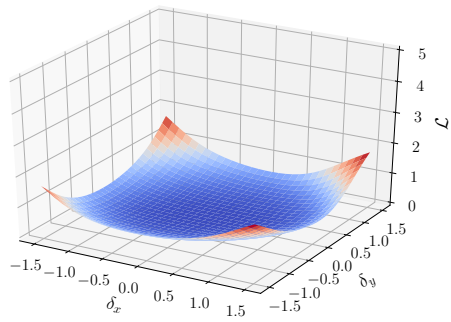

(c) AMP Training Loss

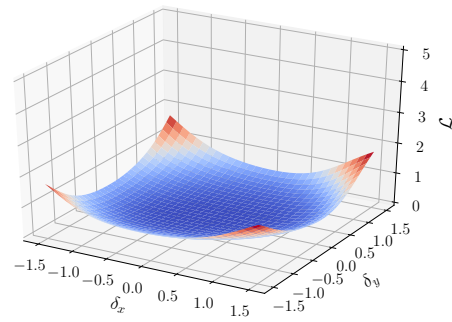

(d) AMP Test Loss

Figure 5: 3D visualization of the minima of the empirical risk selected by ERM and AMP on the SVHN dataset.
